# Supplementary material for: Hypertension, Arterial Stiffness, and Diabetes: a Prospective Cohort Study
Source: PubMed Central journal article supplement — Hypertension. 2022 May 16;79(7):1487–96. doi: 10.1161/HYPERTENSIONAHA.122.19256 (PMC9172905; doi:10.1161/hypertensionaha.122.19256), 2022-05-16
Supplement: hyp-79-1487-s001.pdf [file hyp-79-1487-s001.pdf]

## SUPPLEMENTAL MATERIALS

### **Hypertension, Arterial stiffness, and Diabetes: A Prospective Cohort Study**

**Short title:** Hypertension, Arterial stiffness, and Diabetes

#### **Authors**

Xue Tian, PhD<sup>1,2,3,4\*</sup>; Yingting Zuo, PhD<sup>1,2,3,4\*</sup>; Shuohua Chen, MD<sup>5</sup>; Yijun Zhang, MS<sup>1,2</sup>; Xiaoli Zhang, BS<sup>1,2</sup>; Qin Xu, PhD<sup>1,2</sup>; Shouling Wu, MD<sup>5#</sup>; Anxin Wang, PhD<sup>1,2#</sup>

\*Xue Tian and Yingting Zuo contributed equally to this work.

#### **Affiliations**

<sup>1</sup> Department of Neurology, Beijing Tiantan Hospital, Capital Medical University, Beijing, China.

<sup>2</sup> China National Clinical Research Center for Neurological Diseases, Beijing Tiantan Hospital, Capital Medical University, Beijing, China;

<sup>3</sup> Department of Epidemiology and Health Statistics, School of Public Health, Capital Medical University, Beijing, China;

<sup>4</sup> Beijing Municipal Key Laboratory of Clinical Epidemiology, Beijing, China;

<sup>5</sup> Department of Cardiology, Kailuan Hospital, North China University of Science and Technology, Tangshan, China;

**Corresponding Authors:** Shouling Wu and Anxin Wang

#### **1. Shouling Wu, MD**

Department of Cardiology, Kailuan Hospital, North China University of Science and Technology, 57 Xinhua East Rd, Tangshan, 063000, China.

Email: drwusl@163.com

Telephone: 086-315-3025655

Fax: 086-315-3025655

**2. Anxin Wang, PhD**

China National Clinical Research Center for Neurological Diseases, Beijing Tiantan

Hospital, Capital Medical University, No.119 South 4th Ring West Road, Fengtai

District, Beijing, 100070, China

Email: wanganxin@bjtth.org

Tel: 0086-010-59978538

Fax: 0086-010-59978538

## Supplemental Tables

Table S1. Age- and Sex- specific cutoff point of arterial stiffness measured by baPWV

| Age stratification | Men       | Women     |
|--------------------|-----------|-----------|
| <30 yr             | 1248 cm/s | 1080 cm/s |
| 30-39 yr           | 1345 cm/s | 1162 cm/s |
| 40-49 yr           | 1407 cm/s | 1264 cm/s |
| 50-59 yr           | 1457 cm/s | 1386 cm/s |
| 60-69 yr           | 1589 cm/s | 1581 cm/s |
| ≥70 yr             | 1898 cm/s | 1874 cm/s |

Abbreviations: baPWV, brachial-ankle pulse wave velocity.

Table S2. Baseline characteristics of included participants and excluded participants due to missing information

| Characteristics                    | Excluded        | Included        | ASD/HL estimator, % |
|------------------------------------|-----------------|-----------------|---------------------|
| Participants                       | 9306            | 11156           |                     |
| Age, years                         | 47.91±15.50     | 51.53±11.62     | 26.42               |
| Men, n (%)                         | 5899 (63.79)    | 6380 (57.19)    | 22.03               |
| Body mass index, kg/m <sup>2</sup> | 25.23±3.46      | 24.80±3.40      | 9.49                |
| Heart rate, bpm                    | 73.40±11.24     | 72.70±9.89      | 6.05                |
| baPWV, cm/s                        | 1523.59±365.46  | 1492.83±350.64  | 8.59                |
| Current smoker, n (%)              | 1522 (19.55)    | 3063 (27.46)    | 18.73               |
| Current drinker, n (%)             | 1616 (20.76)    | 3355 (30.07)    | 21.53               |
| Dyslipidemia, n (%)                | 342 (4.39)      | 726 (6.51)      | 9.33                |
| Total cholesterol, mmol/L          | 4.97±1.64       | 4.99±1.68       | 1.18                |
| Triglyceride, mmol/L               | 1.30(0.86-2.12) | 1.23(0.87-1.84) | 6.23                |
| LDL-C, mmol/L                      | 2.60±1.08       | 2.54±0.79       | 6.22                |
| HDL-C, mmol/L                      | 1.55±0.66       | 1.58±0.48       | 3.11                |
| Serum uric acid, µmol/L            | 292.12±89.93    | 284.74±89.00    | 9.31                |
| Hs-CRP, mg/L                       | 1.20(0.60-2.40) | 1.12(0.47-2.05) | 5.60                |
| eGFR, ml/min/1.73m <sup>2</sup>    | 92.21±23.05     | 93.44±19.75     | 5.70                |

Abbreviations: ASD, absolute standardized difference; baPWV, brachial-ankle pulse wave velocity; eGFR, estimated glomerular filtration rate; HDL-C, high density lipoprotein cholesterol; HL estimator: Hodges-Lehmann estimator; hs-CRP, high sensitivity C-reactive protein; HTAS, hypertension with elevated arterial stiffness;

HTNAS, hypertension with normal arterial stiffness; IVF, ideal vascular function; LDL-C, low density lipoprotein cholesterol; NTAS, normotension with elevated arterial stiffness.

Continuous variables were expressed as mean  $\pm$  standard deviation or median with interquartile, categorical variables were expressed as frequency with proportion.

Given the large study population in our study,  $P < 0.05$  in the comparison indicates statistical significance but may not mean clinical significance. Therefore, baseline characteristics between excluded and included participants were compared with ASD for means or percentages, and HL estimator for medians, the indicator  $> 10\%$  is approximately equivalent to  $P$  value less than 0.05, indicating a significant imbalance.

Table S3. Cox analysis of different hypertension and arterial stiffness status using 130/80mmHg as cut-off point

| Outcomes   | IVF       | NTAS            | HTNAS           | HTAS            | <i>P</i> for trend |
|------------|-----------|-----------------|-----------------|-----------------|--------------------|
| Cases, (%) | 64 (2.63) | 49 (5.88)       | 135 (4.82)      | 520 (10.21)     |                    |
| Model 1    | Reference | 2.11(1.46-3.07) | 1.80(1.34-2.42) | 3.82(2.95-4.96) | <0.0001            |
| Model 2    | Reference | 1.94(1.32-2.84) | 1.30(0.95-1.76) | 2.54(1.90-3.39) | <0.0001            |
| Model 3    | Reference | 1.93(1.31-2.83) | 1.26(0.93-1.72) | 2.45(1.84-3.27) | <0.0001            |

Abbreviations: HTAS, hypertension with elevated arterial stiffness; HTNAS, hypertension with normal arterial stiffness; IVF, ideal vascular function; NTAS, normotension with elevated arterial stiffness.

Model 1: unadjusted;

Model 2: adjusted for age, sex, body mass index, heart rate, smoking status, and alcohol consumption;

Model 3: further adjusted for dyslipidemia, total cholesterol, low density lipoprotein cholesterol, high density lipoprotein cholesterol, serum uric acid, high sensitivity C-reactive protein, and estimated glomerular filtration rate.

Table S4. Cox analysis of different hypertension and arterial stiffness status using an age- and sex- specific cut-off point

| Outcomes   | IVF        | NTAS            | HTNAS           | HTAS            | <i>P</i> for trend |
|------------|------------|-----------------|-----------------|-----------------|--------------------|
| Cases, (%) | 141 (3.49) | 205 (6.68)      | 83 (7.14)       | 339 (11.70)     |                    |
| Model 1    | Reference  | 2.04(1.65-2.53) | 2.02(1.54-2.64) | 3.35(2.75-4.08) | <0.0001            |
| Model 2    | Reference  | 1.87(1.50-2.32) | 1.33(1.00-1.75) | 2.23(1.81-2.74) | <0.0001            |
| Model 3    | Reference  | 1.83(1.47-2.27) | 1.29(0.97-1.70) | 2.17(1.77-2.68) | <0.0001            |

Abbreviations: HTAS, hypertension with elevated arterial stiffness; HTNAS, hypertension with normal arterial stiffness; IVF, ideal vascular function; NTAS, normotension with elevated arterial stiffness;

Model 1: unadjusted;

Model 2: adjusted for age, sex, body mass index, heart rate, smoking status, and alcohol consumption;

Model 3: further adjusted for dyslipidemia, total cholesterol, low density lipoprotein cholesterol, high density lipoprotein cholesterol, serum uric acid, high sensitivity C-reactive protein, and estimated glomerular filtration rate.

Table S5. Cox analysis of different hypertension and arterial stiffness status by excluding diabetes within the first 1-year follow-up

| Outcomes   | IVF        | NTAS            | HTNAS           | HTAS            | <i>P</i> for trend |
|------------|------------|-----------------|-----------------|-----------------|--------------------|
| Cases, (%) | 129 (2.94) | 195 (7.28)      | 59 (7.05)       | 337 (10.59)     |                    |
| Model 1    | Reference  | 2.45(1.96-3.06) | 2.30(1.69-3.14) | 3.46(2.82-4.24) | <0.0001            |
| Model 2    | Reference  | 2.17(1.72-2.75) | 1.57(1.14-2.16) | 2.49(1.97-3.13) | <0.0001            |
| Model 3    | Reference  | 2.13(1.68-2.70) | 1.52(1.10-2.09) | 2.42(1.92-3.06) | <0.0001            |

Abbreviations: HTAS, hypertension with elevated arterial stiffness; HTNAS, hypertension with normal arterial stiffness; IVF, ideal vascular function; NTAS, normotension with elevated arterial stiffness;

Model 1: unadjusted;

Model 2: adjusted for age, sex, body mass index, heart rate, smoking status, and alcohol consumption;

Model 3: further adjusted for dyslipidemia, total cholesterol, low density lipoprotein cholesterol, high density lipoprotein cholesterol, serum uric acid, high sensitivity C-reactive protein, and estimated glomerular filtration rate.



Table S6. Cox analysis of different hypertension and arterial stiffness status using competing risk model

| Outcomes   | IVF        | NTAS            | HTNAS           | HTAS            | <i>P</i> for trend |
|------------|------------|-----------------|-----------------|-----------------|--------------------|
| Cases, (%) | 138 (3.14) | 208 (7.69)      | 61 (7.27)       | 361 (11.20)     |                    |
| Model 1    | Reference  | 2.36(1.90-2.93) | 2.22(1.64-3.00) | 3.36(2.76-4.09) | <0.0001            |
| Model 2    | Reference  | 2.16(1.71-2.72) | 1.51(1.11-2.07) | 2.50(1.99-3.14) | <0.0001            |
| Model 3    | Reference  | 2.12(1.68-2.68) | 1.48(1.08-2.03) | 2.43(1.93-3.07) | <0.0001            |

Abbreviations: HTAS, hypertension with elevated arterial stiffness; HTNAS, hypertension with normal arterial stiffness; IVF, ideal vascular function; NTAS, normotension with elevated arterial stiffness;

Model 1: unadjusted;

Model 2: adjusted for age, sex, body mass index, heart rate, smoking status, and alcohol consumption;

Model 3: further adjusted for dyslipidemia, total cholesterol, low density lipoprotein cholesterol, high density lipoprotein cholesterol, serum uric acid, high sensitivity C-reactive protein, and estimated glomerular filtration rate.

Table S7. Association of different hypertension and arterial stiffness status with risk of diabetes with new definition

| Outcomes   | IVF        | NTAS            | HTNAS           | HTAS            | <i>P</i> for trend |
|------------|------------|-----------------|-----------------|-----------------|--------------------|
| Cases, (%) | 134 (3.05) | 188 (6.95)      | 58 (6.92)       | 333 (10.36)     |                    |
| Model 1    | Reference  | 2.42(1.95-3.01) | 2.22(1.64-3.00) | 3.46(2.84-4.20) | <0.0001            |
| Model 2    | Reference  | 2.13(1.70-2.68) | 1.50(1.10-2.06) | 2.45(1.95-3.08) | <0.0001            |
| Model 3    | Reference  | 2.10(1.66-2.64) | 1.46(1.07-2.01) | 2.40(1.90-3.02) | <0.0001            |

Abbreviations: HTNAS, hypertension with normal arterial stiffness; HTMAS, hypertension with moderate arterial stiffness; HTSAS, hypertension with severe arterial stiffness; IVF, ideal vascular function; NTMAS, normotension with moderate arterial stiffness; NTSAS, normotension with severe arterial stiffness.

Model 1: unadjusted;

Model 2: adjusted for age, sex, body mass index, heart rate, smoking status, and alcohol consumption;

Model 3: further adjusted for dyslipidemia, total cholesterol, low density lipoprotein cholesterol, high density lipoprotein cholesterol, serum uric acid, high sensitivity C-reactive protein, and estimated glomerular filtration rate.

Table S8. Association of different hypertension and arterial stiffness status with risk of diabetes

|             | IVF        | NTMAS           | NTSAS           | HTNAS           | HTMAS           | HTSAS           |
|-------------|------------|-----------------|-----------------|-----------------|-----------------|-----------------|
| Case, n (%) | 138 (3.14) | 157(7.18)       | 51(9.85)        | 61(7.28)        | 197(10.07)      | 164(13.06)      |
| Model 1     | Reference  | 2.29(1.82-2.88) | 3.06(2.22-4.22) | 2.22(1.64-3.00) | 3.13(2.52-3.88) | 3.97(3.16-4.98) |
| Model 2     | Reference  | 2.08(1.64-2.64) | 2.89(2.04-4.10) | 1.52(1.12-2.08) | 2.21(1.74-2.80) | 3.29(2.52-4.29) |
| Model 3     | Reference  | 2.06(1.62-2.61) | 2.78(1.96-3.95) | 1.48(1.08-2.02) | 2.16(1.70-2.74) | 3.21(2.46-4.19) |

Abbreviations: HTNAS, hypertension with normal arterial stiffness; HTMAS, hypertension with moderate arterial stiffness; HTSAS, hypertension with severe arterial stiffness; IVF, ideal vascular function; NTMAS, normotension with moderate arterial stiffness; NTSAS, normotension with severe arterial stiffness.

Model 1: unadjusted;

Model 2: adjusted for age, sex, body mass index, heart rate, smoking status, and alcohol consumption;

Model 3: further adjusted for dyslipidemia, total cholesterol, low density lipoprotein cholesterol, high density lipoprotein cholesterol, serum uric acid, high sensitivity C-reactive protein, and estimated glomerular filtration rate.

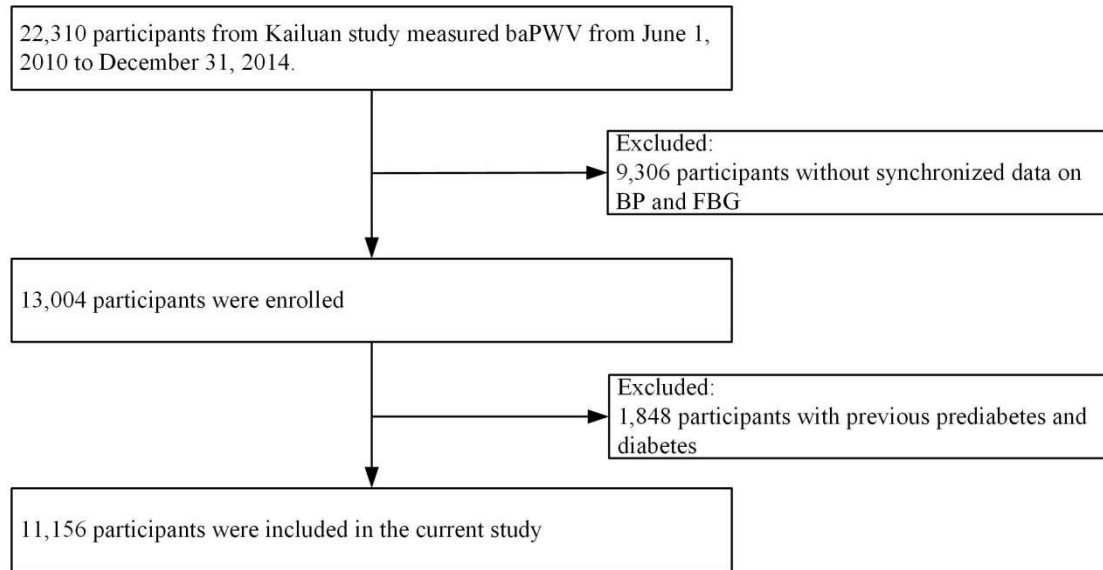

Figure S1. Flowchart of the study

Abbreviations: BP, blood pressure; FBG, fasting blood glucose.
